# Supplementary material for: Bio-based poly(pentamethylene sebacamide) by solid-state polymerization from bio-based monomers
Source: Royal Society of Chemistry journal article supplement (doi:10.1039/d1gc01543e), 2021-01-01
Supplement: d1gc01543e1.pdf [file d1gc01543e1.pdf]

**[Electronic Supplementary Information]**

**Bio-based poly(pentamethylene sebacamide) by solid-state  
polymerization from bio-based monomers**

**Myung Ock Lee,<sup>a,b</sup> Ji Hyun Kim,<sup>b</sup> JaeYun Park<sup>b</sup> and Sang Youl Kim<sup>\*a</sup>**

<sup>a</sup>Department of Chemistry, Korea Advanced Institute of Science and Technology (KAIST), 291  
Daehak-ro, Yuseong-gu, Daejeon 34141, Korea

<sup>b</sup>Lotte Chemical Research Institute, 115 Gajeongbuk-ro, Yuseong-gu, Daejeon 34110, Korea

Correspondence to Sang Youl Kim

e-mail: [kimsy@kaist.ac.kr](mailto:kimsy@kaist.ac.kr)

Fax: +82-42-350-2810

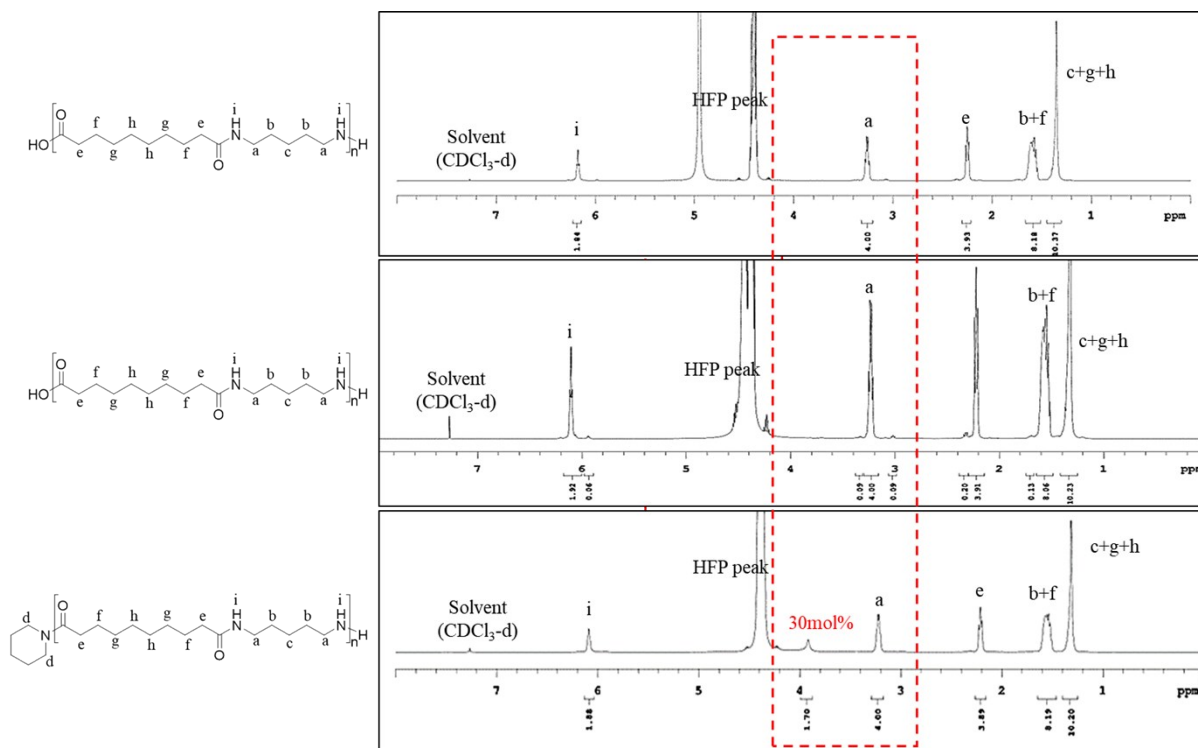

**Figure S1.**  $^1\text{H}$  NMR spectra of bio-PA510 a) prepolymer, b) polymer produced by solid-state polymerization, c) polymer obtained by melt polymerization. HFP is 1,1,1,3,3,3-hexafluoro-2-propanol and  $\text{CDCl}_3\text{-d}$  is chloroform-d.

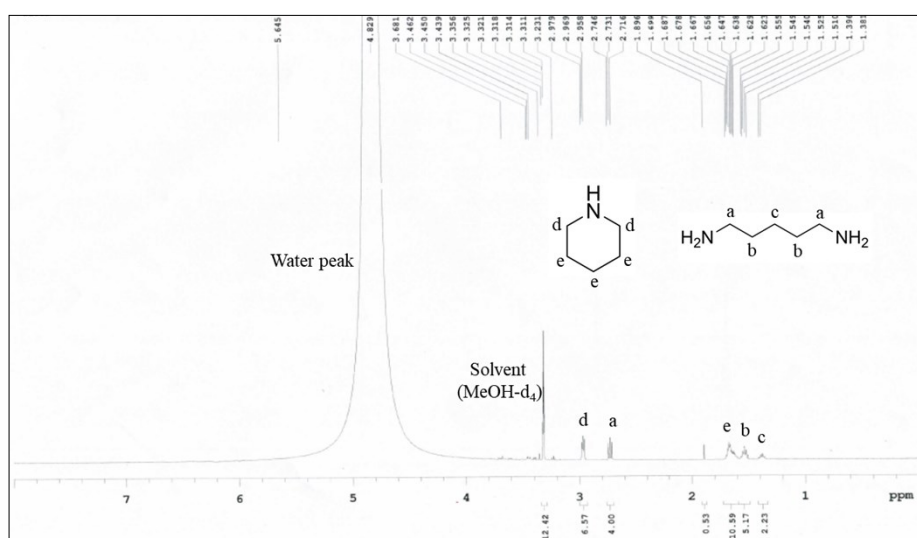

**Figure S2.**  $^1\text{H}$  NMR spectrum of the effluent water (Methanol- $\text{d}_4$ ).

It was also observed that not only the cyclic end groups of the oligomer but also the cyclic monomers from cadaverine during the melt polymerization in the effluent water.  $^1\text{H}$  NMR analysis of effluent water revealed that the cyclic by-product was piperidine which was formed through elimination of ammonia from cadaverine (Methanol- $\text{d}_4$  solvent, Figure S2). The similar results were reported in the case of the polymerization of PA46 from putrescine.<sup>S1, S2</sup>

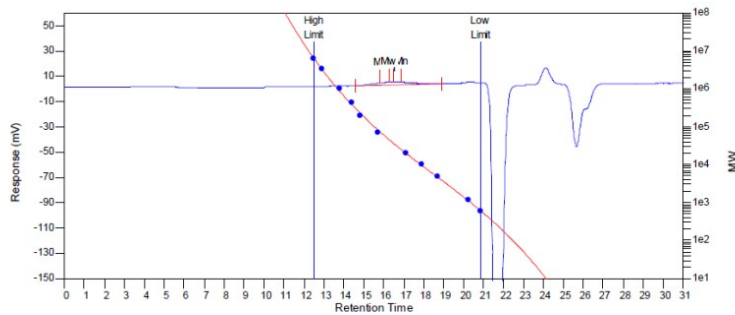

**Figure S3.** GPC chromatogram of bio-PA 510 prepolymer (RV = 1.7,  $M_n$  = 25,100 g/mol,  $M_w$  = 45,800 g/mol,  $\bar{D}$  = 1.82, m-cresol eluent)

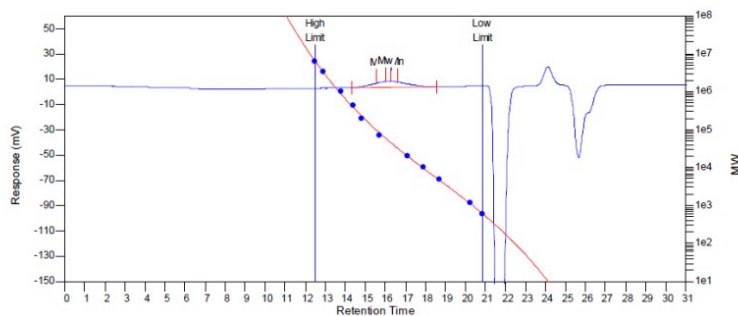

**Figure S4.** GPC chromatogram of bio-PA 510 prepared by SSP (RV = 3.8,  $M_n$  = 94,800 g/mol,  $M_w$  = 157,000 g/mol,  $\bar{D}$  = 1.66, m-cresol eluent)

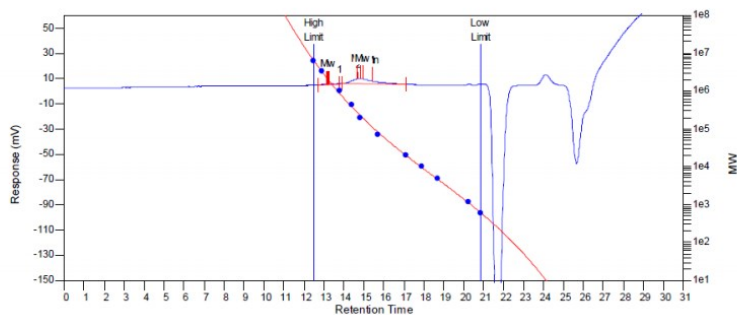

**Figure S5.** GPC chromatogram of bio-PA 510 prepared by melt polymerization (RV = 4.7,  $M_n$  = 114,000 g/mol,  $M_w$  = 187,000 g/mol,  $\bar{D}$  = 1.65, m-cresol eluent)

The molecular weight was analyzed by Gel Permeation Chromatography (GPC, Agilent) with 3 columns (Guard column and two Jordi Resolve 13 $\mu$ m columns) with 1ml/min flow rate at 100°C. m-Cresol was used as solvent with concentration of 1mg/ml. Molecular weight was measured (based on polystyrene standards) with three samples for just checking the molecular weight trend versus the relative viscosity. The results were followings: RV 1.7 (Prepolymer):  $M_n$  was 25,100 g/mol and  $M_w$  was 45,800 g/mol with 1.82 of  $\bar{D}$  value; RV 3.8 of bio-PA510 produced by SSP process:  $M_n$  94,800 g/mol and  $M_w$  157,000 g/mol with 1.66 of  $\bar{D}$  value; RV 4.7 of bio-PA510 produced by melt polymerization:  $M_n$  114,000 g/mol and  $M_w$  187,000 g/mol with 1.65 of  $\bar{D}$  value.

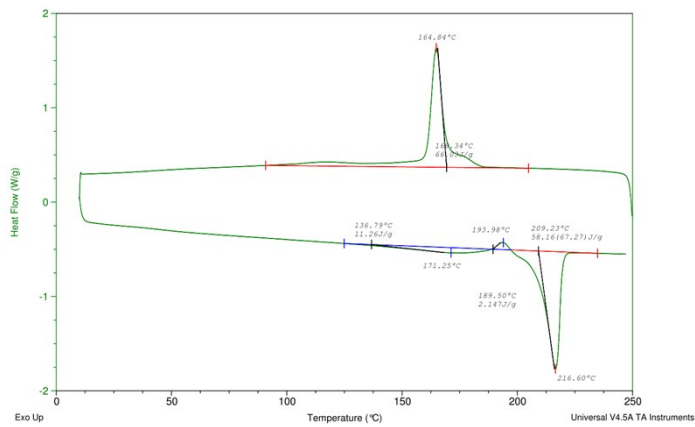

Figure S6. DSC curve of bio-PA 510 prepared by SSP.

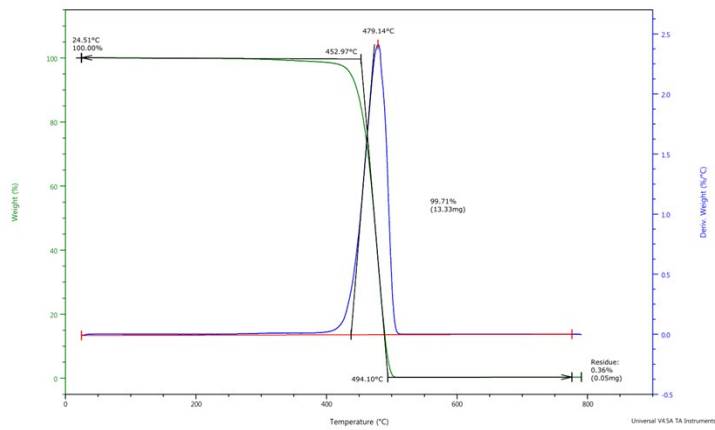

Figure S7. TGA curve of bio-PA 510 prepared by SSP.

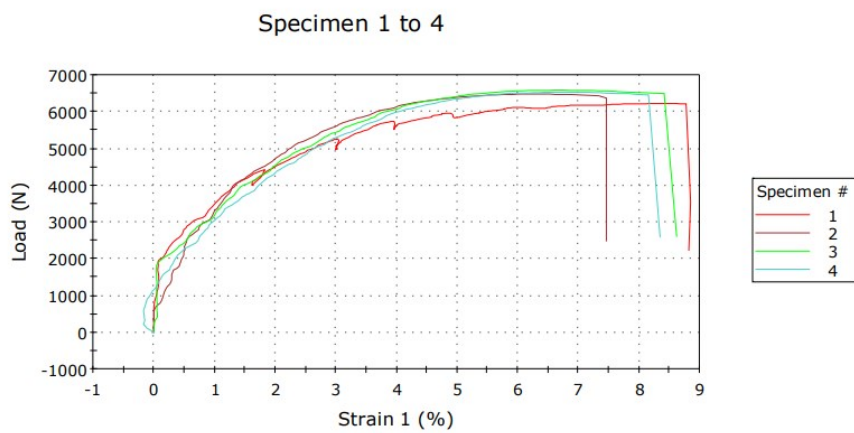

Figure S8. Stress-strain diagram of bio-PA 510 prepared by SSP.

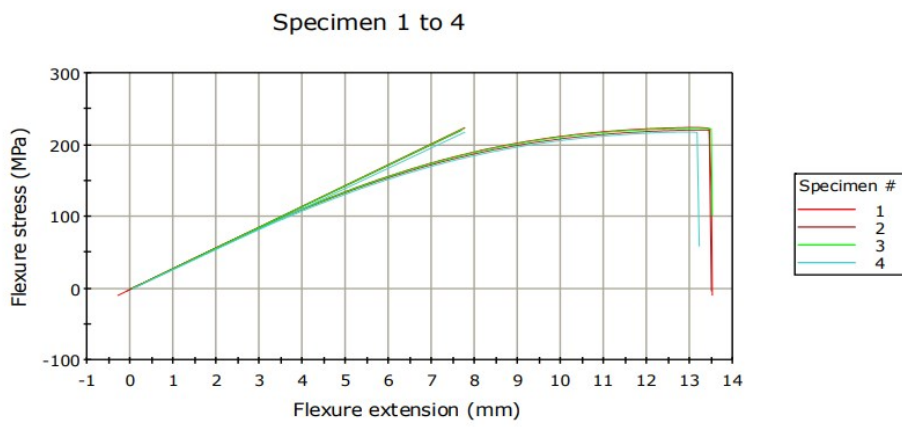

**Figure S9.** Flexure Stress-Flexure extension diagram of bio-PA 510 prepared by SSP.

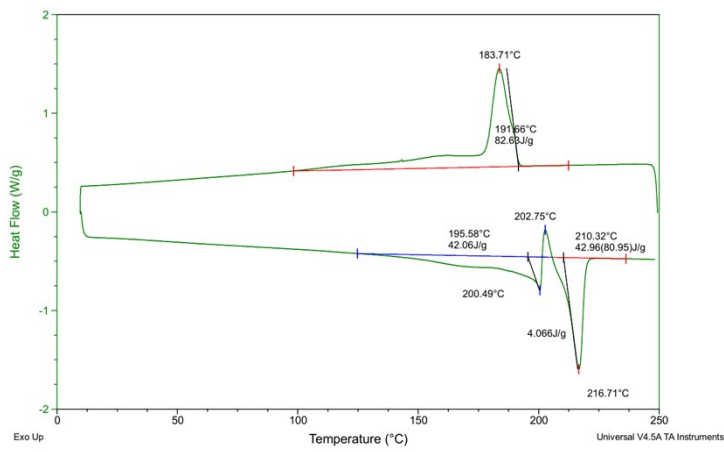

**Figure S10.** DSC curve of PA 612.

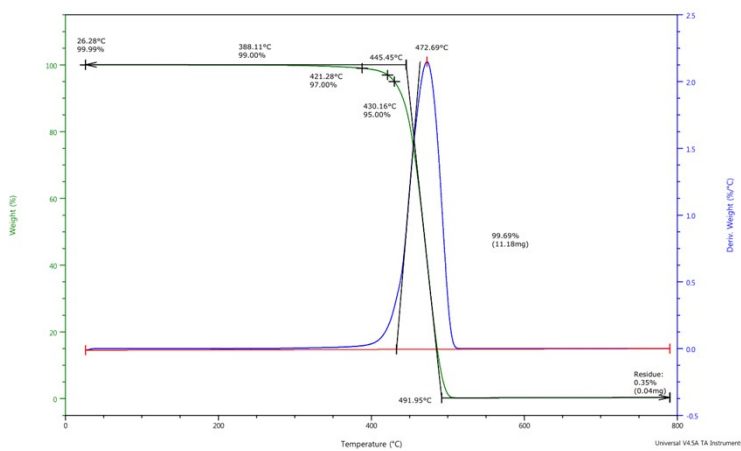

**Figure S11.** TGA curve of PA 612.

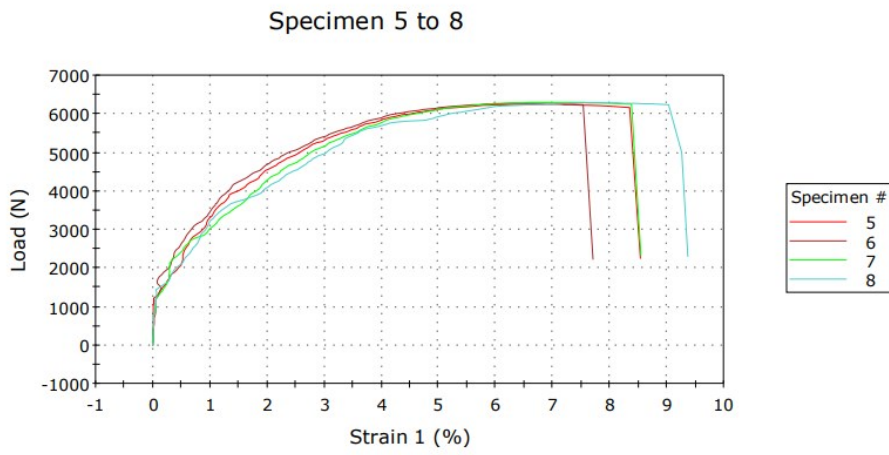

**Figure S12.** Stress-strain diagram of PA 612.

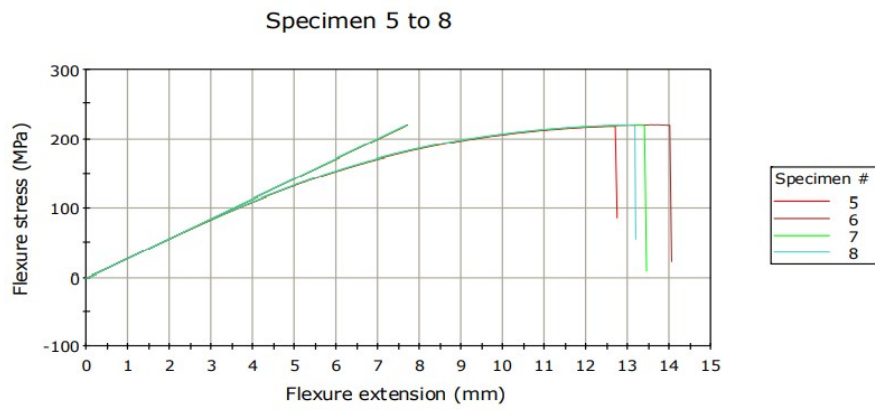

**Figure S13.** Flexure Stress-Flexure extension diagram of PA 612.

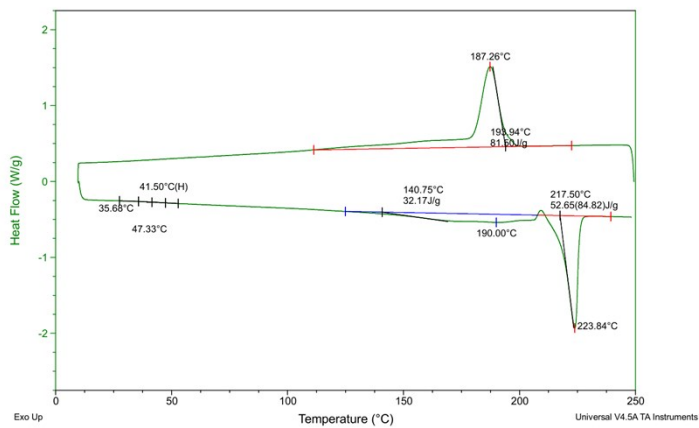

**Figure S14.** DSC curve of PA 610.

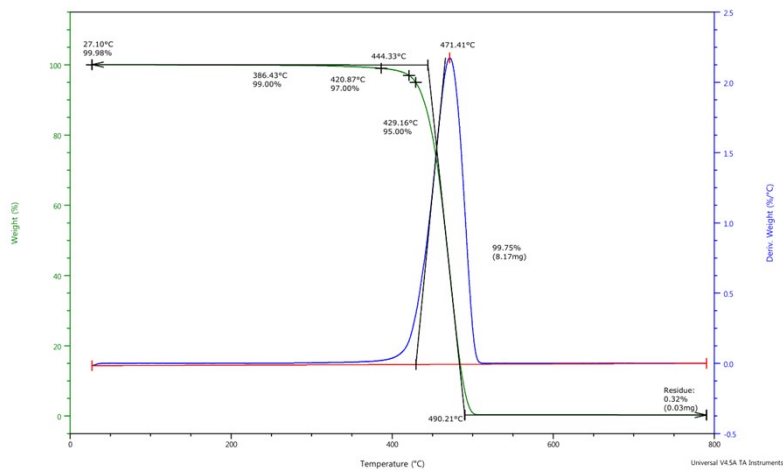

Figure S15. TGA curve of PA 610.

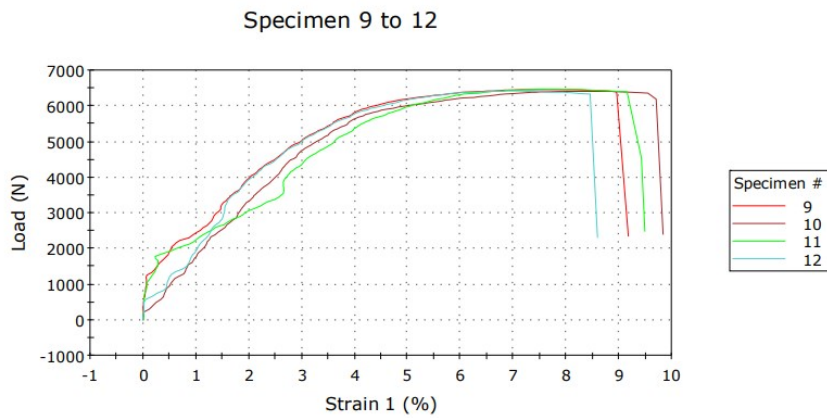

Figure S16. Stress-strain diagram of PA 610.

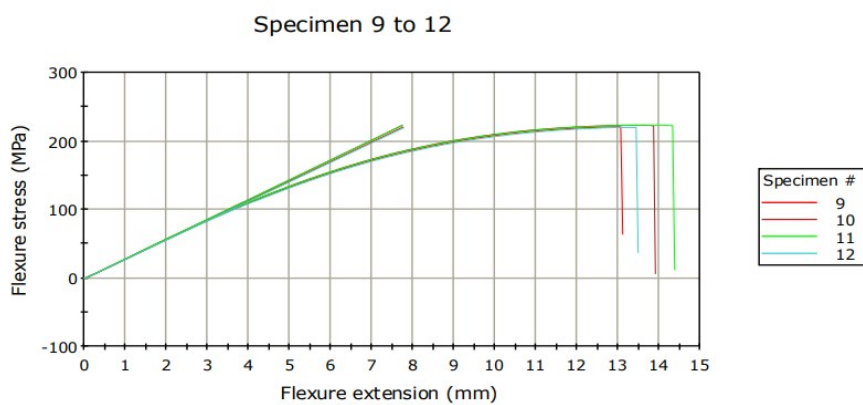

Figure S17. Flexure Stress-Flexure extension diagram of PA 610.

**Table S1.** Thermal and mechanical properties of synthesized bio-PA510 and representative commercialized long-chain nylons, PA610 and PA612.

| Properties                                   | Units             | PA510   | PA612   | PA610   | Standard  |
|----------------------------------------------|-------------------|---------|---------|---------|-----------|
| T <sub>m</sub> / T <sub>d</sub> (Base resin) | °C                | 217/453 | 217/445 | 224/444 | -         |
| Glass fiber contents                         | %                 | 32      | 31      | 31      | -         |
| Density                                      | g/cm <sup>3</sup> | 1.3209  | 1.2941  | 1.3163  | ASTM D792 |
| Yield stress<br>(Tensile strength)           | MPa               | 145     | 141     | 145     | ASTM D638 |
| Breaking stress                              | MPa               | 144     | 141     | 143     |           |
| Elongation at break                          | %                 | 8       | 8       | 9       |           |
| Flexural strength                            | MPa               | 222     | 220     | 222     | ASTM D790 |
| Flexural modulus                             | MPa               | 7270    | 7360    | 7320    |           |
| Notched Izod Impact<br>- 23°C, 3T            | kg.cm/cm          | 13.59   | 19.4    | 19.2    | ASTM D256 |
| Notched Izod Impact<br>- -30°C, 3T           | kg.cm/cm          | 4.3     | 4.3     | 5.3     |           |
| HDT – 18.5kg                                 | °C                | 193     | 190     | 194     | ASTM D648 |
| Shrinkage                                    | %                 | 0.253   | 0.297   | 0.297   | -         |

**Table S2.** % Crystallinity of Bio-PA510, PA610, PA612, PA6 and PA66.

| PA <sub>s</sub> | RV  | $\Delta H_f^{obs}$ (J/g) | $\Delta H_f^0$ (J/g) | Crystallinity (%) |
|-----------------|-----|--------------------------|----------------------|-------------------|
| PA510           | 3.3 | 67.27                    | 257 (PA69)           | 26                |
| PA610           | 3.0 | 84.82                    | 254                  | 33                |
| PA612           | 2.8 | 80.95                    | 258                  | 31                |
| PA6             | 2.5 | 72.16                    | 230                  | 32                |
| PA66            | 2.5 | 93.78                    | 226                  | 41                |

$\Delta H_f^{obs}$  : Enthalpy of polymer samples obtained from DSC analysis

$\Delta H_f^0$ : Enthalpy of 100% crystalline polymer (theoretical values from References<sup>S3</sup>)

$$\text{Crystallinity (\%)} = \frac{\Delta H_f^{obs}}{\Delta H_f^0} \times 100$$



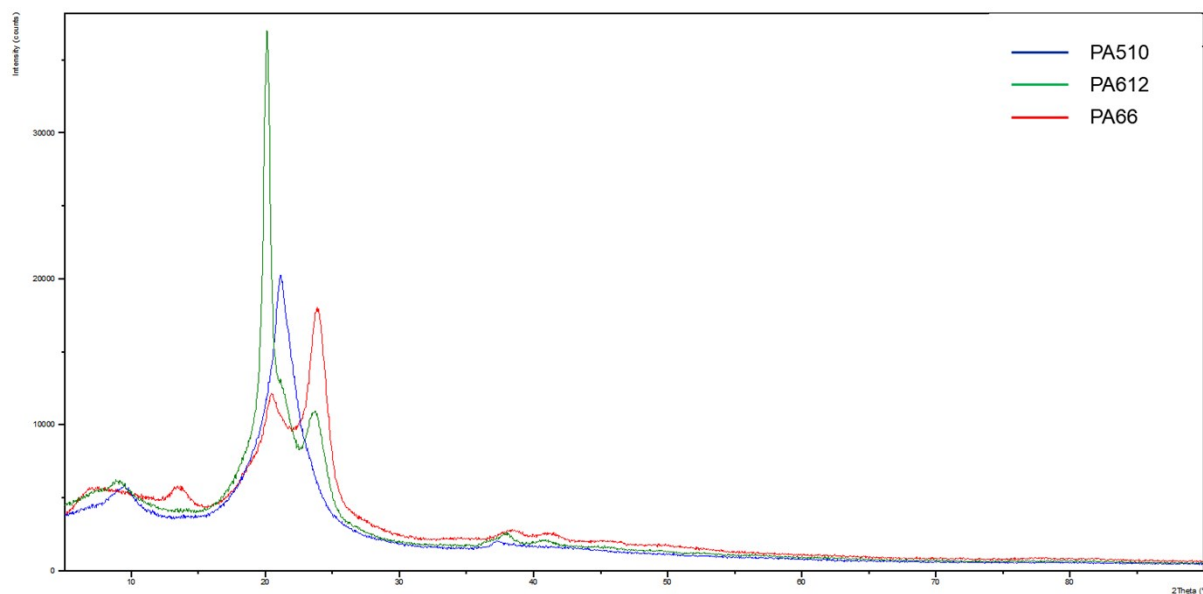

**Figure S18.** XRD patterns of bio-PA510, PA612, and PA66.

## References

- S1 R. J. Gaymans, T. E. C. Vanutteren, J. W. A. Vandenberg and J. Schuyer, *J. Polym. Sci.*, 1977, **15**, 537-545.
- S2 E. Roerdink and J. M. M. Warnier, *Polymer*, 1985, **26**, 1582-1588.
- S3 R. L. Blaine, TA Instruments, Thermal applications note, Polymer heat of fusion.
